# Supplementary material
Source: Springer Nature journal article supplement (https://www.springermedizin.de/resource/supplementary/12936_2006_319_MOESM1_ESM.pdf/9547464)
Supplement: MOESM1 [file 9547464]

### **Voucher Issuing**

Programmatic factors:

- staff training
- 'screening' / eligibility criteria
- availability of vouchers
- availability of ITNs
- affordability of top-up
- commercial partners placing ITNs in clinics for direct sales

### **Voucher Redemption**

Programmatic factors:

- stock levels of ITNs
- non-voucher sales of ITNs
- choice of brands
- choice of ITN sizes, colours

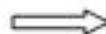

### **Contextual Factors**

Current household ownership of nets  
Competing ITN delivery strategies  
Competition for limited ITNs from major urban areas of other regions
